# Supplementary material
Source: PubMed Central journal article supplement (PMC4078134)
Supplement: 10-1055-s-0034-1368243-sup_gf773.pdf [file 10-1055-s-0034-1368243-sup_gf773.pdf]

# Die 3-tägige Kombinationsbehandlung der Vulvovaginalkandidose mit Clotrimazol-200-mg-Vaginaltabletten und Clotrimazol-Creme für die Vulva ist signifikant besser als die mit Vaginaltabletten allein – eine ältere multizentrische, placebokontrollierte Doppelblindstudie

Three-Day Combination Treatment for Vulvovaginal Candidosis with 200 mg Clotrimazol Vaginal Suppositories and Clotrimazol Cream for the Vulva is Significantly Better than Treatment with Vaginal Suppositories Alone – an Earlier, Multi-Centre, Placebo-Controlled Double Blind Study

## Autoren

W. Mendling<sup>1</sup>, R. Schlegelmilch<sup>2</sup>

## Institute

<sup>1</sup> Deutsches Zentrum für Infektionen in Gynäkologie und Geburtshilfe, Wuppertal

<sup>2</sup> Dr. Kade Pharmazeutische Fabrik GmbH, Berlin

## Schlüsselwörter

- Vulvovaginalkandidose
- Clotrimazol-Vaginaltabletten
- Clotrimazol-Creme
- Kombinationstherapie

## Key words

- vaginal candidosis
- clotrimazol vaginal suppositories
- clotrimazol cream
- combination treatment

## Zusammenfassung

**Problem:** Die akute Vulvovaginalkandidose (VVK) kann nach den Leitlinien sowohl vaginal, kombiniert vaginal und mit Creme für die Vulva oder oral behandelt werden. Es fehlen aber Untersuchungen zur Frage, ob die kombinierte Therapie von Vagina und Vulva bessere Ergebnisse ergibt als die alleinige vaginale Behandlung.

**Methode:** Es wurden im Jahr 1999 in 10 deutschen gynäkologischen Praxen 160 Patientinnen mit Candida-Vulvovaginitis eingeschlossen und randomisiert mit 3 Clotrimazol-Vaginaltabletten 200 mg + Clotrimazol-2%-Creme (Verum n=79) oder + Placebo (wirkstofffreie Cremegrundlage = 79) behandelt. Die Untersuchungen erfolgten vor Therapie (T1), 6–8 Tage nach Therapieende (T2) und etwa 4 Wochen nach Therapieende (T3). Neben den demografischen Daten wurden bei jeder Untersuchung standardisiert die klinischen Befunde dokumentiert sowie ein Nativpräparat und eine Pilzkultur abgenommen. Arzt und Patientin beurteilten den Heilungsverlauf und die Verträglichkeit. Primäre Wirksamkeitsvariable waren die Prä-/Post-Differenz der Scores für die extravaginale Rötung.

**Ergebnisse:** An T1 bestanden keine Unterschiede in beiden Gruppen. Zum Zeitpunkt T2 war zwischen der Verum- und der Placebogruppe die extravaginale Rötung signifikant verschieden ( $p=0,0002$ ), ebenso in der Untergruppe der Per-Protocol-Analyse (Verum 64, Placebo 70 Patientinnen,  $p=0,0015$ ). Der genitale Juckreiz bzw. das Brennen waren bei 51 bzw. 56% der Verumgruppe und bei nur 30 bzw. 45% der Placebogruppe an T2 ganz verschwunden ( $p=0,0181$ ). Bei der intravaginalen Rötung gab es an T1 und T2 in beiden Gruppen keinen Unterschied. Die ärztliche Gesamtbeurteilung fiel entsprechend aus ( $p=0,0004$ ). Bei T1 war die extravaginale Pilzkultur in der Verum- vs. der Placebogruppe bei 75 vs. 76 Frauen positiv, an T2 aber bei 51,9 vs. 73,1%

## Abstract

**Problem:** According to the guidelines, acute vulvovaginal candidosis (VVC) may be treated vaginally, through a combination of vaginal treatment and cream for the vulva or orally. However, there is a lack of investigations into whether combined treatment for the vagina and vulva achieves better results than vaginal treatment alone.

**Method:** In 1999, 160 patients with vulvovaginal candidosis from ten German gynaecological practices were included in a study and treated on a randomised basis with three 200 mg clotrimazol vaginal suppositories + clotrimazol 2% cream (verum n=79) or + placebo (active-ingredient-free cream base n=79). The examinations took place before treatment (T1), six to eight days following the end of treatment (T2) and approximately four weeks following the end of treatment (T3). In addition to demographic data, the clinical findings of each investigation were documented in a standardised way and a native preparation and a fungal culture were taken. The doctor and patient evaluated the healing process and tolerance. The main efficacy variables were the pre/post difference scores for extravaginal redness.

**Results:** On T1, there was no difference between the two groups. By T2, there was a significant difference in the extent of extravaginal redness between the verum and the placebo groups ( $p=0,0002$ ), as well as in the subgroup of the per-protocol analysis (verum 64, placebo 70 patients,  $p=0,0015$ ). Genital itching or burning had entirely disappeared in 51% and 56% of patients respectively in the verum group and in only 30% and 45% of patients in the placebo group on T2 ( $p=0,0181$ ). There was no difference in intravaginal redness on T1 and T2 in either group. The overall assessment by the doctor went accordingly ( $p=0,0004$ ). On T1, the extravaginal fungal culture was positive in 75 women in the verum group and in 76 women in the placebo group. On

eingereicht 25.11.2013  
revidiert 17.2.2014  
akzeptiert 23.2.2014

## Bibliografie

DOI <http://dx.doi.org/10.1055/s-0034-1368243>  
Geburtsh Frauenheilk 2014; 74:  
1–6 © Georg Thieme Verlag KG  
Stuttgart · New York ·  
ISSN 0016-5751

## Korrespondenzadresse

**Prof. Werner Mendling**  
Deutsches Zentrum für  
Infektionen in Gynäkologie  
und Geburtshilfe  
Vogelsangstraße 106  
42109 Wuppertal  
[w.mendling@t-online.de](mailto:w.mendling@t-online.de)

( $p=0,0054$ ), in der Vagina wurde nur bei 6 vs. 8 Frauen (7,5 vs. 10,1%,  $p=0,3802$ ) eine positive Kultur nachgewiesen. Die lokale Verträglichkeit war in beiden Gruppen mit 70% sehr gut bzw. 29 vs. 27% gut. Nach 4 Wochen (T3) waren aus der Verumgruppe 16 von 23 und aus der Placebogruppe nur 8 von 21 extravaginalem Pilzkulturen negativ.

**Diskussion:** Es fehlen Studien zur Frage, ob die vaginale oder kombiniert vulvovaginale Therapie der akuten VVK günstiger seien. Zwei Studien unterstützen aber die signifikanten Ergebnisse dieser Arbeit, dass bei akuter VVK die Kombination aus 3 Clotrimazol-200-mg-Vaginaltabletten mit Clotrimazol-Creme 2% besser ist als mit Vaginaltabletten allein.

## Einleitung

Es ist aufgrund der Literatur ausreichend und leitliniengerecht, die unkomplizierte akute Vulvovaginalkandidose der prämenopausalen Frau nur mit einem Vaginaltherapeutikum ohne zusätzlicher Creme für die Vulva (den Introitus) zu behandeln [8, 10].

Die Frage, ob eine Creme für die Vulvaregion (zusätzlich oder allein) nötig sei, entscheidet der Arzt nach den klinischen Zeichen und der Symptomatik oder die Patientin im Fall der Selbsttherapie aufgrund ihrer Beschwerden.

Die akute, unkomplizierte Vulvovaginalkandidose ist derzeit als OTC-Indikation anerkannt [11]. Etwa 80–90% der verkauften Antimykotika für den vulvovaginalen Bereich werden von der Patientin Over-the-counter (OTC) im Rahmen der Selbsttherapie ohne ärztliche Diagnostik gekauft.

Jedoch mehren sich in den letzten Jahren kritische Stimmen, dass durch nicht indizierte Gabe von genital applizierten Antimykotika (meist Clotrimazol) Fehlbehandlungen erfolgen [3] und das mit ca. 5–8% Häufigkeit bei Frauen anzunehmende Vestibulodynie-Syndrom [6] induziert oder aggraviert werde.

Merkwürdigerweise fehlen im Schrifttum Studien, in denen explizit der Frage nachgegangen wird, ob eine alleinige vaginale Therapie bei der akuten Vulvovaginalkandidose ausreichend ist oder ob die zusätzliche Gabe einer Creme für die Vulva die Heilungsergebnisse verbessert. Diese Frage sollte mit der vorliegenden Studie geklärt werden. Aufgrund einer erst 2011 erschienenen Arbeit [1] zu dieser Thematik hat der Erstautor (W. M.) die Publikation angeregt.

## Material und Methoden

Es wurden 160 Frauen in die Studie eingeschlossen, wenn sie über 18 Jahre alt waren, eine Candida-Vulvovaginitis mit Ausdehnung auf die kleinen und großen Labien hatten und in die Studie eingewilligt hatten.

Frauen mit bekannter Allergie gegen die Prüfpräparate, gleichzeitiger Therapie mit oralen Antimykotika, mit bekannter Resistenz der Candidaart auf Clotrimazol und Frauen in der Schwangerschaft und Stillzeit wurden ausgeschlossen.

Bei mangelnder Compliance, nicht vertretbaren unerwünschten Nebenwirkungen oder auf Wunsch der Patientin erfolgte der Abbruch der einzelnen Prüfung.

T2, however, this was positive in 51.9% (verum) and 73.1% (placebo) of cases, and a positive culture was evinced in the vagina in 6 vs. 8 women (7.5 vs. 10.1%,  $p=0,3802$ ). The local tolerance in both groups was 70% very good, and 29 vs. 27% good. After four weeks (T3), 16 out of 23 patients in the verum group and only 8 out of 21 in the placebo group had negative extravaginal fungal cultures.

**Discussion:** There is a lack of studies into the issue of whether vaginal treatment or combined vulvovaginal treatment of acute VVC would be more advantageous. However, there are two studies that support the significant results of this paper that when it comes to acute VVC, the combination of three 200 mg clotrimazol vaginal suppositories with clotrimazol cream 2% is better than with vaginal suppositories alone.

## Studiendesign

Prüfpräparate waren:

- Therapiearm 1: 3 Clotrimazol-Vaginaltabletten 200 mg + Clotrimazol-Creme (1 g enthält 20 mg Clotrimazol)
- Therapiearm 2: 3 Clotrimazol-Vaginaltabletten 200 mg + wirkstofffreie Cremegrundlage (Placebo).

Die Patientinnen wurden zufällig nach Computerrandomisierung einer Behandlung zugewiesen. Die Vaginaltabletten wurden abends vor dem Schlafengehen mit einem Vaginalapplikator eingeführt. Die Creme wurde zusätzlich auf die Vulva aufgetragen. Für Arzt und Patientin waren aufgrund codierter Packungsaufschriften keine Unterschiede erkennbar.

Alle zusätzlichen Vaginalia (z.B. Intimspray, vaginale Antikonzeptiva etc.) waren nicht erlaubt.

Nicht verabreichte Medikation musste zurückgegeben werden. Untersuchungstermine waren T1 vor Therapie, T2 6–8 Tage nach Therapieende und T3 etwa 4 Wochen nach T2 im Folgezyklus.

Untersuchungen/Maßnahmen an T1:

- Erhebung demografischer Daten und ggf. von Begleiterkrankungen
- Diagnosestellung mit dem Nativpräparat (Phasenkontrast)
- Beurteilung der extravaginalem Rötung anhand einer 5-stufigen Skala (0 = nicht vorhanden, 4 = sehr stark ausgeprägt)
- Beurteilung der Rötung der Vagina, sowie von Juckreiz und Brennen
- Einverständniserklärung der Patientin
- Abnahme von je einem Abstrich von der Vulva und der Vagina zur Pilzkultur
- Ausgabe der Prüfmedikation

Untersuchungen/Maßnahmen an T2:

- Beurteilung der klinischen Symptome wie bei T1
- Nativpräparat
- Pilzkulturen wie T1

► Ermittlung unerwünschter Ereignisse

► Ermittlung der Compliance

► Beurteilung des Heilungsverlaufs

► Beurteilung der lokalen Verträglichkeit

► Rückgabe ggf. unverbrauchter Studienmedikamente

Untersuchungen/Maßnahmen an T3:

- Abnahme von Abstrichen zur Pilzkultur wie bei T1

## Statistische Auswertung

Die extravaginalem Rötung wurde als primäre Wirksamkeitsvariable der Prä-post-Differenz angesehen. Die statistische Bearbeitung erfolgte mit dem einseitigen Wilcoxon-Mann-Whitney-Test auf 5% Signifikanzniveau. Alle anderen Vergleichparameter wur-

den explorativ ohne statistische Signifikanzberechnung ausgewertet. Die phasenkontrastmikroskopische Beurteilung der Nativpräparate und die Ergebnisse der Pilzkulturen (Candida-nachweis ohne Artbestimmung) an T2 wurden mit dem exakten Fisher-Test verglichen.

Um einen statistisch signifikanten Unterschied nachzuweisen, war eine Fallzahl von mindestens 76 Patientinnen pro Gruppe berechnet worden (Programm „Nnpa“ der Fa. Idv, Gauting).

## Ergebnisse

### Studienpopulation

Die Studie fand von Juli bis September 1999 in 10 deutschen gynäkologischen Praxen statt. Pro Zentrum wurden 16 Patientinnen eingeschlossen, sodass 160 Frauen mit der (Verdachts-)Diagnose Candida-Vulvovaginitis aufgenommen werden konnten. Von ihnen erfüllten je 79 Frauen der Verum- und der Placebogruppe = 158 Frauen die Einschlusskriterien.

Eine Patientin der Verumgruppe führte morgens zusätzlich Knoblauch in die Vagina ein. Sie wurde nicht von der Auswertung ausgeschlossen, da sich diese primär auf die Rötung der Vulva bezog.

Da sich in der demografischen Verteilung der Daten von Alter (Mittelwert um ca.  $34 \pm 14$  Jahre), Größe (ca.  $166 \pm 7$  cm) und Gewicht (ca.  $62 \pm 9$  kg) keine statistischen Unterschiede ergaben, wird auf eine tabellarische Darstellung verzichtet.

In beiden Gruppen befanden sich 4 Frauen mit Diabetes mellitus. Alle anderen Nebenergebnisse waren für die Studienergebnisse unbedeutend.

Alle Patientinnen hielten die vorgesehenen Therapieregimes ein.

### Extravaginale Rötung

Zum Zeitpunkt T1 bestanden keine Unterschiede ( $p = 0,1516$ ) zwischen der Verum- und der Placebogruppe mit mittleren Scores der Rötung von 3,13 (Verumcreme) und 3,32 (Placebo-creme).

Zum Zeitpunkt T2 jedoch hatte die extravaginale Rötung in der Verumgruppe um 2,03 Scorepunkte abgenommen, während die Abnahme in der Placebogruppe nur 1,25 Punkte betrug ( $p = 0,0002$ ). In der Verumgruppe hatten 45% der Frauen gar keine und weitere 27% nur eine leichte Rötung (zusammen 72%), in der Placebogruppe aber nur 27 bzw. 13% (zusammen 52%).

Auch in der Gruppe der Patientinnen, die alle Kriterien des Prüfplans erfüllt hatten (per protocol, Verumgruppe 64, Placebogruppe 70) fiel  $p = 0,0015$  hoch signifikant aus.

Diese Unterschiede bestanden auch in 8 der 10 Prüfzentren.

### Juckreiz

Zum Zeitpunkt T1 bestand in beiden Gruppen bei etwa 40% der Frauen sehr starker und bei weiteren etwa 35–40% starker Juckreiz mit einem mittleren Score von 3,09 in der Verum- und 3,22 in der Placebogruppe.

Zum Zeitpunkt T2 war der Juckreiz in der Verumgruppe bei 51% der Patientinnen ganz verschwunden, in der Placebogruppe nur bei 30%. In der Verumgruppe gaben 76% der Frauen keinen oder nur leichten Juckreiz an, in der Placebogruppe nur 55% ( $p = 0,0181$ ).

### Brennen

Zum Zeitpunkt T1 wurden in der Verumgruppe ein mittlerer Score von 2,71 und in der Placebogruppe von 2,86 angegeben.

Bei der Kontrolle zum Zeitpunkt T2 waren 56% der Verumgruppe ohne Brennen und 45% der Placebogruppe, der mittlere Score betrug 1,72 vs. 1,54 ( $p = 0,2161$ , nicht signifikant verschieden).

### Intravaginale Rötung

Da beide Gruppen mit je einer Clotrimazol-Vaginaltablette 200 mg an 3 Tagen behandelt wurden, sollte kein prä- und posttherapeutischer Unterschied hier zu erwarten sein. Das ist der Fall:

Vor Therapie wurde die Rötung in der Verumgruppe bei 25% als sehr stark und bei 35% als stark mit einem mittleren Score von 2,82 eingestuft, in der Placebogruppe entsprechend mit 42%, 28% und 3,03.

Zum Zeitpunkt T2 wurde die intravaginale Rötung in der Verumgruppe bei 86% und in der Placebogruppe bei 83% (Score-Differenz 2,65 bzw. 2,62 Punkte) nicht mehr beobachtet ( $p = 0,5538$ , nicht signifikant verschieden).

### Ärztliche Gesamtbeurteilung

In der Verumgruppe wurde bei 54% der Patientinnen völlige Abheilung und bei 22% deutliche Besserung (mittlerer Score 1,81) angegeben, in der Placebogruppe 30 bzw. 2% (mittlerer Score 2,42). Der Unterschied ist hoch signifikant ( $p = 0,0004$ ).

### Mykologische Befunde

#### Phasenkontrastmikroskopie, Vagina

Bei T1 waren alle mikroskopischen Befunde der Verum- und der Placebogruppe positiv (Einschlusskriterium).

Bei T2 fielen in der Verumgruppe 12 von 78 (15,4%) und in der Placebogruppe 15 von 77 (19,5%) positiv aus ( $p = 0,3228$ ).

#### Kulturelle Befunde

Zur Kontrolluntersuchung T3 nach 4 Wochen kamen leider nur 25 Patientinnen der Verum- und 23 der Placebogruppe.

**Extravaginal/Vulva** Vor Therapie war die extravaginale Pilzkultur bei 75 Patientinnen der Verumgruppe und bei 76 Patientinnen der Placebogruppe positiv, bei 4 bzw. 3 negativ.

Am Termin T2 fiel die Pilzkultur bei 73,1% der Verumgruppe und bei 51,9% der Placebogruppe negativ aus ( $p = 0,0054$ ).

Bei der Untersuchung nach 4 Wochen (T3) waren aus der Verumgruppe 7 von 23 positiv, aus der Placebogruppe 8 von 21.

**Vagina** Vor Therapie waren je 78 Pilzkulturen der beiden Gruppen positiv.

Nach Therapie bei T2 fielen noch 6 positive Kulturen der Verumgruppe und 8 der Placebogruppe auf ( $p = 0,3802$ , nicht signifikant verschieden).

Nach 4 Wochen (T3) waren 2 von 25 Kulturen aus der Verumgruppe und 2 von 23 der Placebogruppe positiv.

### Unerwünschte Ereignisse

Es wurde von je einer Patientin der Verum- und der Placebogruppe Brennen bei der Applikation der Creme von Tag 1 bis Tag 3 angegeben.

Eine weitere Patientin der Placebogruppe klagte über 2 Tage lang dauerndes Abschälen der Haut.

### Verträglichkeit (ärztliche Beurteilung)

Die lokale Verträglichkeit von Clotrimazol-Vaginaltabletten + Clotrimazol-Creme bzw. Placebocreme wurde in beiden Gruppen in knapp 70% der Fälle als sehr gut, in weiteren je 29 bzw. gut 27% als gut bewertet.

Alle Ergebnisse sind in **Tab. 1** zusammengefasst.

**Tab. 1** Extravaginale (Vulva-)Rötung, Brennen im Introitus und mykologische Befunde vor Therapiebeginn (T1), 6 Tage nach Therapieende (T2) und 4 Wochen später (T3).

|                                                               | Verum<br>T1 (%) | Placebo<br>T1 (%) | Verum<br>T2 (%) | Placebo<br>T2 (%) | Verum<br>T3 (%) | Placebo<br>T3 (%) |
|---------------------------------------------------------------|-----------------|-------------------|-----------------|-------------------|-----------------|-------------------|
| extravaginale Rötung (Introitus, Vulva)                       |                 |                   |                 |                   |                 |                   |
| nein + leicht                                                 | 2,5             | 1,3               | 26,9            | 13,0              |                 |                   |
| mäßig, stark, sehr stark                                      | 97,5            | 98,7              | 28,2            | 60,4              |                 |                   |
| mittlerer Score                                               | 3,13            | 3,32              | 2,03            | 1,25              |                 |                   |
|                                                               | n. s.           |                   | p = 0,0002      |                   |                 |                   |
| intravaginale Rötung                                          |                 |                   |                 |                   |                 |                   |
| nein + leicht                                                 | 86              | 83                |                 |                   |                 |                   |
| stark + sehr stark                                            | 60              | 70                |                 |                   |                 |                   |
| mittlerer Score                                               | 2,82            | 3,03              | 2,65            | 2,62              |                 |                   |
|                                                               | n. s.           |                   | n. s.           |                   |                 |                   |
| Juckreiz                                                      |                 |                   |                 |                   |                 |                   |
| nein + leicht                                                 | 2,6             | 3,8               | 75,7            | 54,6              |                 |                   |
| mäßig, stark, sehr stark                                      | 97,4            | 96,2              | 24,3            | 45,5              |                 |                   |
| mittlerer Score                                               | 3,09            | 3,22              | 2,09            | 1,65              |                 |                   |
|                                                               | n. s.           |                   | p = 0,0181      |                   |                 |                   |
| Brennen (mittlerer Score)                                     | 2,71            | 2,86              | 1,72            | 1,54              |                 |                   |
|                                                               | n. s.           |                   | n. s.           |                   |                 |                   |
| mykologische Kultur positiv                                   |                 |                   |                 |                   |                 |                   |
| Vagina                                                        | 98,7            | 98,7              | 7,7             | 10,4              | 2/25: 8,0       | 2/23: 8,7         |
|                                                               | n. s.           |                   | n. s.           |                   | n. s.           |                   |
| Vulva                                                         | 94,9            | 96,2              | 26,9            | 48,1              | 7/23: 8,7       | 8/21: 8,0         |
|                                                               | n. s.           |                   | p = 0,0054      |                   | n. s.           |                   |
| ärztliche Gesamtbeurteilung<br>(doppelblind, mittlerer Score) |                 |                   |                 |                   | 1,81            | 2,42              |
| Heilung + deutliche Besserung (%)                             |                 |                   |                 |                   | 76              | 32                |
|                                                               |                 |                   |                 |                   | p = 0,0004      |                   |

## Diskussion

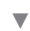

### Bemerkungen zur Nomenklatur

Die Vulva ist als „die äußeren weiblichen Geschlechtsteile“ definiert [13].

Klinisch kann man aber „Symptomgrenzen“ zwischen der Vagina und ihrem Introitus unter Einschluss der Innenseite der kleinen Labien einerseits und andererseits dem verhornenden Plattenepithel der äußeren Vulva mit Außenseite der kleinen Labien, den großen Labien und Übergang zur Perianal- und Interkruralregion sehen.

Um einheitliche Definitionen für die verschiedenen Erscheinungsformen der Vulvovaginalkandidose z. B. auch für die Durchführung klinischer Studien zu haben, wurden im Jahr 1991 von 5 Experten, alle Vorstandsmitglieder der Deutschsprachigen Mykologischen Gesellschaft und/oder der Arbeitsgemeinschaft für Infektionen und Infektionsimmunologie in der Gynäkologie und Geburtshilfe, Empfehlungen zur Nomenklatur verabschiedet und publiziert [4].

Dabei wurde unterteilt in die

1. Vulvakandidose, bei der sich die vesikulöse, die diffus ekzematöide, die follikuläre Form und das (seltene) Candida-Granulom unterscheiden lassen,
2. in die Vaginalkandidose, unterschieden in Kolonisation, latente, leichte, mittelschwere und schwere Vaginalkandidose, und
3. in die Vulvovaginalkandidose, bei der Vulva und Vagina gleichzeitig in den dort beschriebenen Unterteilungen betroffen sind.

Die Sexually Transmitted Diseases Treatment Guidelines 2010 der Centers for Disease Control and Prevention der USA definie-

ren unter „Diagnostic Considerations“: „A diagnosis of Candida vaginitis is suggested clinically by the presence of external dysuria and vulvar pruritus, pain, swelling, and redness. Signs include vulvar edema, fissures, excoriations, or thick, curdy vaginal discharge...“ [10].

Die bisherige deutsch- und englischsprachig publizierte Leitlinie zur Vulvovaginalkandidose [8] und die Neufassung von 2014 [2] beschreiben Pruritus, Ausfluss, vaginale Rötung, Dysurie, und ggf. Schwellung der kleinen Labien. Es wird auch darauf hingewiesen, dass man zwischen den vulvären Erscheinungsformen, nämlich der vesikulösen, der ekzematoiden und der follikulären Form, unterscheiden kann.

Es gibt keine verlässlichen Angaben zur Frequenz von (nur) Vaginalkandidosen oder (kombiniert) Vulvovaginalkandidosen (beide kommen nur unter Östrogeneinfluss vor) oder (nur) Vulvakandidosen (die eher ein postmenopausales Phänomen bei z. B. Adipositas oder Diabetes mellitus sind). Es scheint auch in der Fachliteratur keine sichere namentliche Unterscheidung zwischen Vaginal- und Vulvovaginalkandidose zu geben, da selbst von Meinungsbildenden internationalen Autoren im gleichen Artikel beide Bezeichnungen vorkommen können.

So ist es nicht verwunderlich, dass auch bei der Therapie bisher keine klaren Regeln bestehen.

### Therapie der Vulvovaginalkandidose nach Leitlinien, Literatur und Praxis

Die Vulvovaginalkandidose beeinträchtigt sowohl in der akuten als auch besonders in der chronisch rezidivierenden Form erheblich die Lebensqualität der betroffenen Frauen, was mit validier-

ten Fragebögen zur Prüfung der körperlichen und seelischen Verfassung bewiesen wurde [7].

Die Centers for Disease Control and Prevention der USA empfehlen für die unkomplizierte Vulvovaginalkandidose zur Therapie „short course topical formulations (i.e. single dose and regimens of 1–3 days) ... The topically applied azole drugs are more effective than nystatin. Treatment with azoles results in relief of symptoms and negative cultures in 80–90% of patients who complete therapy.“ [10]. Eine Mitbehandlung des asymptomatischen Partners wird nicht empfohlen. Eine Tabelle listet 9 Over-the-Counter-Medikamente als Vaginalcreme **oder** Vaginalsuppositorien auf sowie weitere 5 in den USA verschreibungspflichtige Präparate als Vaginalcreme **oder** Vaginaltabletten und außerdem die orale Therapie mit einmal 150 mg Fluconazol.

Ähnliche Empfehlungen zur Therapie der akuten Vulvovaginalkandidose gehen aus der neuen deutschen Leitlinie unter Punkt 10.3 hervor [2].

Einen (nicht repräsentativen, aber praxisnahen) Eindruck über das Vorgehen von Frauenärzten im Alltag ergibt sich aus einer orientierenden anonymen schriftlichen Befragung des Autors um 2002 von je 50 Frauenärzten in den Bezirken Kreuzberg (ehemals Westen) und Friedrichshain (ehemals Osten) von Berlin (beide Bezirke sind inzwischen zu einem zusammengelegt worden). Es gaben 29 der 50 Kreuzberger und 19 der 50 Friedrichshainer Frauenärzte an, je nach individueller Situation eine Kombipackung für Vagina und Vulva bei Vulvovaginalkandidose zu verschreiben. Weiterhin gaben 21 der 50 Kreuzberger und 15 der 50 Friedrichshainer Frauenärzte an, den asymptomatischen Partner mitzubehandeln (was evidenzbasiert nicht erforderlich ist) [5].

Aus vielen Publikationen geht hervor, dass die Therapieergebnisse bei Vulvovaginalkandidose mit nur vaginaler Therapie gleich gut ausfallen wie mit oraler Therapie, so auch in einer Cochrane-Analyse [12].

Sobel weist in einer Vergleichsstudie darauf hin, dass bei gleichen Heilungsergebnissen bei oraler Fluconazol-Therapie mit 1-mal 150 mg gegen 7 Tage intravaginaler Clotrimazol-Therapie die individuellen Wünsche der Patientin mit berücksichtigt werden sollten [15].

In einer multizentrischen Studie mit 679 Frauen mit akuten Vulvovaginalkandidosen wurden die Ergebnisse von Patientinnen verglichen, die entweder mit 150 mg Fluconazol oder 500 mg Clotrimazol als Ein-Tages-Therapie vaginal oder mit 10% Clotrimazol-Vaginalcreme behandelt worden waren. Den Frauen war es freigestellt, nach Ihren eigenen Bedürfnissen zusätzlich zur vaginalen Applikationsform noch 1- bzw. 2%ige Clotrimazol-Creme auf die Vulva zu geben. Der vulväre Juckreiz war in allen Therapiearmen erst frühestens am 3. Tag beseitigt (ein bekanntes Phänomen). Die Heilungsergebnisse der 3 Studienarme waren statistisch nicht signifikant verschieden [9].

### Zur vorliegenden Studie – mögliche Bias bei der Diagnose

Einschlusskriterien waren neben der klinisch, mikroskopisch und kulturell bestätigten Vaginalkandidose eine „ausgeprägte Vulvitis mit Befall der großen Labien“, die anhand der Rötung vor und nach Therapie beurteilt wurde. Im Sinn der Definitionen der Vulvovaginalkandidose (s. „Bemerkungen zur Nomenklatur“) ist der Befall des verhornenden Plattenepithels der großen Labien eine – hier bei Rötung – beginnende ekzematöse Vulvakandidose. (Möglicherweise war also das bei einer Patientin der Placebogruppe berichtete Schälen der Haut keine „unerwünschte Neben-

wirkung“ des Placebos, sondern das Fortschreiten der Hautkandidose mangels antimykotischer Wirkung).

Eigentlich bedarf eine Vulvakandidose der großen Labien immer einer gesonderten lokalen Therapie, wenn nicht oral behandelt wird. Andererseits ist das Ausmaß der Vulvabeteiligung trotz des Kriteriums „ausgeprägte Vulvitis mit Befall der großen Labien“ subjektiv beeinflusst.

Die Hautveränderung bzw. Rötung ist als einziges Symptom der ärztlichen Beurteilung zugänglich, da Juckreiz und Brennen unspezifische, subjektive Parameter seitens der Patientin sind. Jedenfalls ist anzunehmen, dass das Ausmaß der Vulvakandidose trotz Rötung der großen Labien nicht der Definition einer ausgeprägten ekzematösen Vulvakandidose entsprochen haben kann, weil kein gewissenhafter Arzt im Rahmen einer Studie hier ein Placebo zulassen könnte.

Gerade in diesen häufigen Grenzfällen aber werden Studien-ergebnisse als Grundlage für die Praxis gebraucht.

Der Pilznachweis im Nativpräparat könnte wie die Pilzkultur einerseits nur Kolonisation bedeuten, andererseits eine ärztliche Fehlinterpretation sein, wie es auch klar daraus hervorgeht, dass bei der Kontrolluntersuchung zum Termin 2 von den Ärzten in 15,4 bzw. 19,5% der Fälle Pilze im Nativpräparat beschrieben wurden, obwohl die gleichzeitige vaginale Pilzkultur nur in 7,7 bzw. 10,4% der Fälle positiv ausfiel!

Dass die klinische Diagnose vor Therapie aber stimmte, ist unzweifelhaft, da alle eingeschlossenen Patientinnen neben der klinischen Symptomatik eine positive Candidakultur aufwiesen.

### Diskussion der Ergebnisse

Eindeutig und mit statistisch hoher Signifikanz ist in dieser Studie die Kombination einer vaginalen Clotrimazol-Therapie mit einer zusätzlichen Clotrimazol-Creme für die Vulva der einfachen vaginalen Therapie überlegen.

Es gibt bisher nur eine dem Autor bekannte Publikation, in der die akute Vulvovaginalkandidose mit nur vaginaler gegen kombiniert vaginale und vulväre Lokaltherapie verglichen worden ist. Dabei wurde festgestellt: „When candidosis is both vulvar and vaginal, the combination of sertaconazole cream with a monodose sertaconazole vaginal suppository trends to improve clinical cure at D (day) 7 and D 14 and to relief more patients as early as D2 than the vaginal suppository used as a single treatment“ [14].

Beikert et al. [1] weisen wegen häufig positiver symptomatischer Pilzkulturen von Abstrichen aus dem interlabialen Sulcus auf das mögliche „Pilzreservoir“ der Vulvahaut bei chronisch rezidivierenden Vulvovaginalkandidosen hin und fordern deshalb trotz oraler Therapie mit Fluconazol eine zusätzliche Creme (hier Clotriproloxamin) für die Vulva (obwohl Fluconazol in der Haut ausreichend hohe Wirkstoffspiegel aufweisen dürfte). Allerdings fehlt in der Studie ein Vergleichskollektiv.

### Fazit

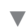

Die Kombination einer vaginalen Clotrimazol-Therapie mit einer zusätzlichen Clotrimazol-haltigen Creme für die Vulva ist der einfachen vaginalen Therapie statistisch signifikant überlegen. Allein aufgrund dieses Ergebnisses ist die vorliegende Studie trotz der lange zurückliegenden Zeit von 14 Jahren wert, publiziert und diskutiert zu werden, da ihre Ergebnisse von praktischem Nutzen sind.

## Interessenkonflikt

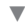

Der erstgenannte Autor bekommt für die Veröffentlichung des Artikels ein Autorenhonorar von Dr. Kade Pharmazeutische Fabrik GmbH Berlin.

## Literatur

- 1 Beikert FC, Le MT, Koeninger A et al. Recurrent vulvovaginal candidosis: focus on the vulva. *Mycoses* 2011; 54: e807–e810
- 2 Brasch J, Cornely O, Effendy I et al. Leitlinie Die Vulvovaginalkandidose. AWMF 015/072. 2014. Online: [www.awmf.org/uploads/tx\\_szleitlinien/015-072L\\_S2k\\_vulvovaginalkandidose\\_2013-12.pdf](http://www.awmf.org/uploads/tx_szleitlinien/015-072L_S2k_vulvovaginalkandidose_2013-12.pdf)
- 3 Ferris DG, Nyirjesy P, Sobel JD et al. Over-the-counter antifungal drug misuse associated with patient-diagnosed vulvovaginal candidiasis. *Obstet Gynecol* 2002; 99: 419–425
- 4 Mendling W. Die Vulvovaginalkandidose. *Der Frauenarzt* 1992; 33: 195–196
- 5 Mendling W. Vaginose, Vaginitis, Zervizitis und Salpingitis. Heidelberg: Springer; 2006
- 6 Mendling W. Burning vulva, Vulvodynie, vulvares Vestibulitis-Syndrom. *Frauenarzt* 2008; 49: 314–317
- 7 Mendling W, Birkner V. Die Vakzination mit inaktivierten Laktobazillen oder Heliotherapie kann die Lebensqualität von Frauen mit chronisch rezidivierender vulvovaginaler Kandidose verbessern – Eine prospektive, 3-armige randomisierte Studie. *Geburtsh Frauenheilk* 2011; 71: 767–772
- 8 Mendling W, Brasch J; German Society for Gynecology and Obstetrics; Working Group for Infections and Infectimmunology in Gynecology and Obstetrics; German Society of Dermatology, the Board of German Dermatologists; German Speaking Mycological Society. Guideline vulvovaginal candidosis (2010) of the German Society for Gynecology and Obstetrics, the Working Group for Infections and Infectimmunology in Gynecology and Obstetrics, the German Society of Dermatology, the Board of German Dermatologists and the German Speaking Mycological Society. *Mycoses* 2012; 55 (Suppl. 3): 1–13
- 9 Mendling W, Krauss C, Fladung B. A clinical multicenter study comparing efficacy and tolerability of topical combination therapy with clotrimazole (Canesten, two formats) with oral single dose fluconazole (Diflucan) in vulvovaginal mycoses. *Mycoses* 2004; 47: 136–142
- 10 Workowski KA, Berman S; Centers for Disease Control and Prevention (CDC). Sexually transmitted disease treatment guidelines, 2010. *MMWR Recomm Rep* 2010; 59 (RR-12): 1–110
- 11 Mohr P. Clotrimazol in der Selbstmedikation bei Vaginalmykosen. *Der Deutsche Apotheker* 1994; 46: 2–6
- 12 Nurbhai M, Grimshaw J, Watson M et al. Oral versus vaginal imidazole and triazole anti-fungal treatment of uncomplicated vulvovaginal candidiasis (Thrush). *Cochrane Database Syst Rev* 2007; 4: CD002845
- 13 Pschyrembel W. Klinisches Wörterbuch. 264. Auflage. Berlin: Walter de Gruyter GmbH; 2012
- 14 Quereux C, Gelas B, Chevallier T et al. [Evaluation of the efficacy and speed of action of sertaconazole nitrate suppository and cream combined treatment for vulvovaginal candidiasis]. *Gynecol Obstet Fertil* 2000; 28: 238–244 (Artikel in französischer Sprache)
- 15 Sobel J, Brooker D, Stein GE et al. Single oral dose fluconazole topical therapy of Candida vaginitis. *Am J Obstet Gynecol* 1995; 172: 1263–1268
